# Supplementary material for: Pharmacy-based screening to detect persons at elevated risk of type 2 diabetes: a cost-utility analysis
Source: PubMed Central journal article supplement (PMC8418722; doi:10.1186/s12913-021-06948-6), 2021-09-05

**Additional file 2.** Population used in the Markov model showing the steps used to estimate the size of the target population cohort.

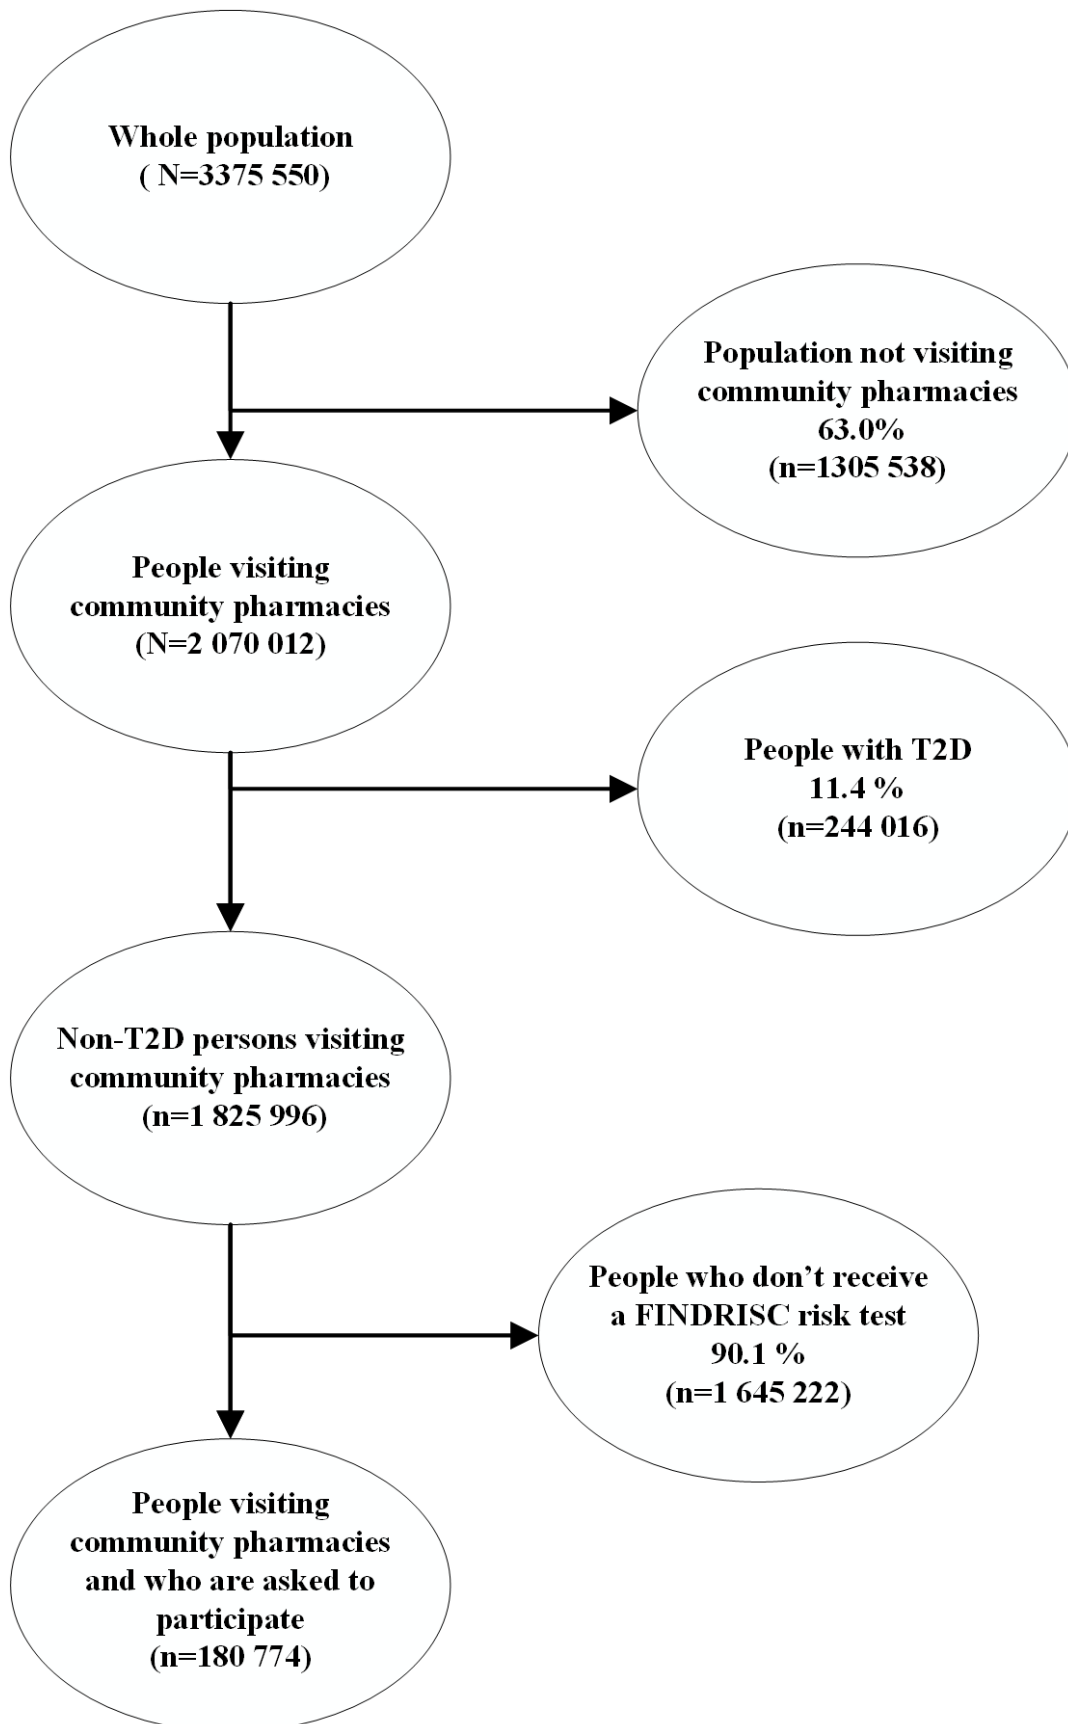

Supplement: 12913_2021_6948_MOESM2_ESM.pdf [file 12913_2021_6948_MOESM2_ESM.pdf]
